# Supplementary material
Source: HighWire-hosted journal article supplement (https://www.annfammed.org/highwire/filestream/14735/field_highwire_adjunct_files/0/TuzzioSupp.pdf)
Supplement: TuzzioSupp.pdf [file TuzzioSupp.pdf]

## Supplemental materials for

Tuzzio L, Wellman RD, De Marchis EH, et al. Social risk factors and desire for assistance among patients receiving subsidized health care insurance in a US-based integrated delivery system. *Ann Fam Med*. 2022;20(2):137-144.

Supplemental Table 1. Survey measures, items, and response categories

| Measure                                                                                                 | Survey item and response options                                                                                                                                                                                                                                                                                                                                                                                                                                                             |
|---------------------------------------------------------------------------------------------------------|----------------------------------------------------------------------------------------------------------------------------------------------------------------------------------------------------------------------------------------------------------------------------------------------------------------------------------------------------------------------------------------------------------------------------------------------------------------------------------------------|
| Self-reported general health                                                                            | <b>In general, would you say your health is...</b><br>Excellent; Very good; Good; Fair; Poor                                                                                                                                                                                                                                                                                                                                                                                                 |
| Attitudes                                                                                               |                                                                                                                                                                                                                                                                                                                                                                                                                                                                                              |
| Trust in provider                                                                                       | <b>How much do you trust your health care provider(s) at Kaiser Permanente?</b><br>1 2 3 4 5 6 7 8 9 10<br>Not Completely<br>at all                                                                                                                                                                                                                                                                                                                                                          |
| Perceived <i>appropriateness</i> of screening                                                           | <b>Do you think it is appropriate to be asked questions about your social and economic needs at a Kaiser Permanente clinic?</b><br>a) Very appropriate; b) Somewhat appropriate; c) Neither appropriate nor inappropriate; d) Somewhat inappropriate; e) Very inappropriate                                                                                                                                                                                                                  |
| Perceived <i>comfort</i> with being asked questions about social risks <sup>5</sup>                     | <b>Please circle if you felt uncomfortable today being asked any of the questions about:</b><br>a) Housing; b) Food access; c) Medical or non-medical transportation; d) Electric, gas, oil, or water utility services; e) None of these                                                                                                                                                                                                                                                     |
| Perspectives on health care's role in addressing social risks                                           | <b>What do you think your health care team should do to help with basic needs?</b><br>a) Nothing, it isn't part of their job to help with these; b) They should at least know that a patient is struggling with basic needs; c) They should connect people with community programs that help with basic needs; d) They should offer medical care that is thoughtful of the basic needs a person struggles with; e) They should fund community programs that can help people with basic needs |
| Social risks                                                                                            |                                                                                                                                                                                                                                                                                                                                                                                                                                                                                              |
| Material needs (housing stability and quality, transportation, food security, and paying for utilities) | <b>What is your living situation today?</b> (Yes to b or c = "insecure housing stability")<br>a) I have a steady place to live; b) I have a place to live today, but I am worried about losing it in the future; c) I do not have a steady place to live (I am temporarily staying with others, in a hotel, in a shelter, living outside on the                                                                                                                                              |

|                                                |                                                                                                                                                                                                                                                                                                                                                                                                                                                                                                                                                                                                                                                                                                                                                                                                                                                                                                                                                                                                                                                                                                                                        |
|------------------------------------------------|----------------------------------------------------------------------------------------------------------------------------------------------------------------------------------------------------------------------------------------------------------------------------------------------------------------------------------------------------------------------------------------------------------------------------------------------------------------------------------------------------------------------------------------------------------------------------------------------------------------------------------------------------------------------------------------------------------------------------------------------------------------------------------------------------------------------------------------------------------------------------------------------------------------------------------------------------------------------------------------------------------------------------------------------------------------------------------------------------------------------------------------|
|                                                | <p>street, on a beach, in a car, abandoned building, bus or train station, or in a park)</p> <p><b>Think about the place you live. Do you have problems with any of the following?</b> (Yes to a-g = “poor housing quality”)</p> <p>a) Lack of heat; b) Lead paint or pipes; c) Water leaks; d) Mold; e) Pests such as bugs, ants or mice; f) Smoke detectors missing or not working; g) Oven or stove not working; h) None</p> <p><b>In the past 12 months, has the electric, gas, oil, or water company threatened to shut off services in your home?</b></p> <p>a) Yes; b) No</p> <p><u>For the following items, participants were asked how frequently true the following statements were</u></p> <p><b>Within the past 12 months, you worried that your food would run out before you got money to buy more.</b> (Yes to a or b = “worry about food lasting”)</p> <p>a) often; b) Sometimes; c) Never true</p> <p><b>Within the past 12 months, the food you bought just didn’t last and you didn’t have money to get more.</b> (Yes to a or b = “had no money to pay for food”)</p> <p>a) often; b) Sometimes; c) Never true</p> |
| Desire for assistance with social risks        | <p><b>Would you like to receive assistance with any of the following issues?</b> (<i>Circle ALL that apply</i>)</p> <p><b>a)</b> Food access; b) Housing; c) Medical or non-medical transportation; d) Electric, gas, oil, or water utility services; e) None</p>                                                                                                                                                                                                                                                                                                                                                                                                                                                                                                                                                                                                                                                                                                                                                                                                                                                                      |
| Health care’s role in helping with basic needs | <p><b>What do you think your health care team should do to help with basic needs?</b> (<i>Circle ALL that apply</i>)</p> <p>a) Nothing, it isn’t part of their job to help with these</p> <p>b) They should at least know that a patient is struggling with basic needs</p> <p>c) They should connect people with community programs that help with basic needs</p> <p>d) They should offer medical care that is thoughtful of the basic needs a person struggles with</p> <p>e) They should fund community programs that can help people with basic needs</p>                                                                                                                                                                                                                                                                                                                                                                                                                                                                                                                                                                         |

---

Supplemental Table 2. Risk domain by comfort being screened

| Risk Domain    | N with Risk | Missing* | %             |
|----------------|-------------|----------|---------------|
|                |             |          | Uncomfortable |
| Housing        | 150         | 1        | 14.8          |
| Food           | 105         | 1        | 15.4          |
| Utilities      | 30          | 1        | 34.5          |
| Transportation | 41          | 1        | 15.0          |

\*Uncomfortable variable is missing. Percentage used denominator N-M.
